# Supplementary material for: Genome-wide sequence identification and expression analysis of ARF family in sugar beet (Beta vulgaris L.) under salinity stresses
Source: PeerJ. 2020 Jun 4;8:e9131. doi: 10.7717/peerj.9131 (PMC7276148; doi:10.7717/peerj.9131)
Supplement: File S2 [file peerj-08-9131-s003.xlsx]

## Sheet: ARF GO
ARF name	GO ID
Bv1_000500_ghtj	GO:0005634	GO:0006355	GO:0009725
Bv1_002880_qzmp	GO:0003677	GO:0005515	GO:0005634	GO:0006355	GO:0009725
Bv1_022070_hgze	GO:0005634	GO:0006355
Bv2_035870_qfwi	GO:0003677	GO:0005515	GO:0005634	GO:0006355	GO:0009725
Bv2_047650_jrpi	GO:0003677	GO:0005634	GO:0006355	GO:0009725
Bv4_084470_okdq	GO:0003677	GO:0005515	GO:0005634	GO:0006355
Bv5_113390_yzaj	GO:0005515	GO:0005634
Bv5_125780_orwr	GO:0003677	GO:0005515	GO:0005634	GO:0006355	GO:0009725
Bv6_145940_kddw	GO:0003677	GO:0005634
Bv7_161770_eqms	GO:0003677	GO:0005515	GO:0005634	GO:0006355
Bv8_182410_opag	GO:0003677	GO:0005634	GO:0006355	GO:0009725
Bv8_190650_zzhs	GO:0005634	GO:0006355
Bv9_203750_gcik	GO:0003677	GO:0005515	GO:0005634	GO:0006355	GO:0009725
Bv9_208190_efdx	GO:0003677	GO:0005515	GO:0005634	GO:0006355	GO:0009725
