# Supplementary material for: Genome-wide sequence identification and expression analysis of ARF family in sugar beet (Beta vulgaris L.) under salinity stresses
Source: PeerJ. 2020 Jun 4;8:e9131. doi: 10.7717/peerj.9131 (PMC7276148; doi:10.7717/peerj.9131)
Supplement: Supplemental Information 1 [file peerj-08-9131-s001.xlsx]

## Sheet: leaves
Template	gene	1	2	3	Template	gene	1	2	3
CK	ICDH	22.0897	22.2388	22.0004	300	ICDH	22.0798	22.0061	22.159
	ghtj	20.6437	20.6811	20.6872		ghtj	22.3547	22.248	22.153
	qzmp	19.3057	19.7437	19.5466		qzmp	20.1286	19.8354	20.1417
	hgze	21.3415	21.035	21.1051		hgze	21.5642	21.7413	21.7562
	qfwi	22.1722	22.2277	22.0314		qfwi	22.5452	22.2716	22.4648
	jrpi	23.8269	23.7859	23.9584		jrpi	23.73	23.7968	23.7964
	okdq	19.6659	19.9603	19.4491		okdq	21.1551	21.1666	21.2341
	yzaj	19.0393	18.8592	19.2205		yzaj	19.0071	19.0603	18.937
	orwr	18.7675	18.5848	18.603		orwr	19.127	18.9297	19.2618
	kddw	19.0006	18.8799	19.0538		kddw	19.3461	19.2766	19.2834
	eqms	22.2489	22.4079	22.3525		eqms	22.18	22.0195	22.206
	opag	20.4063	20.2032	20.4656		opag	21.5329	21.668	21.5709
	zzhs	19.968	19.7026	19.5732		zzhs	21.1625	21.0606	21.013
	gcik	23.6079	23.341	23.2543		gcik	22.4543	22.8453	22.8631
	efdx	21.2309	21.783	21.353		efdx	22.3728	22.6146	22.8031

## Sheet: roots
Template	gene	1	2	3	Template	gene	1	2	3
CK	ICDH	23.4203	23.4149	22.8034	300	ICDH	25.0402	24.3974	24.3067
	ghtj	22.2692	22.0604	22.2729		ghtj	24.2603	24.0969	24.0361
	qzmp	20.3124	20.7153	20.605		qzmp	22.4074	22.2882	22.4002
	hgze	20.9064	20.7613	20.8165		hgze	20.5038	20.5344	20.541
	qfwi	20.8433	20.9679	21.004		qfwi	22.2469	22.2061	22.1503
	jrpi	22.6951	22.5723	22.5339		jrpi	23.9157	24.0695	24.1831
	okdq	22.062	22.177	21.9918		okdq	22.7092	22.5889	22.4502
	yzaj	20.8019	20.7121	21.5019		yzaj	20.571	20.625	20.6795
	orwr	18.9444	18.7021	18.6847		orwr	19.8984	19.8404	19.9639
	kddw	20.1452	20.1381	20.1402		kddw	20.7567	20.749	20.492
	eqms	22.7808	22.9629	22.7864		eqms	24.3793	23.9945	24.0985
	opag	23.2561	23.2247	23.2581		opag	24.0794	24.328	24.2369
	zzhs	20.3894	20.5498	20.6706		zzhs	21.388	21.3286	21.4198
	gcik	25.2481	23.2392	23.0712		gcik	23.6879	23.8275	23.947
	efdx	23.2008	23.1649	23.2019		efdx	23.791	23.5927	23.447
